# Supplementary material for: 3D-engineered WO 3 microspheres assembled by 2D nanosheets with superior sodium storage capacity
Source: Royal Society of Chemistry journal article supplement (doi:10.1039/d4ra01800a), 2024-01-01
Supplement: d4ra01800a1.pdf [file d4ra01800a1.pdf]

## Supporting information

### 3D- engineered WO<sub>3</sub> microspheres assembled by 2D nanosheets with superior sodium storage capacity

Shilpi Sengupta<sup>1</sup>, C. Sudakar<sup>2</sup>, and Manab Kundu<sup>1,\*</sup>

<sup>1</sup> Electrochemical Energy Storage Laboratory, Department of Chemistry, SRM Institute of  
Science and Technology, Chennai 603203, Tamil Nadu, India

<sup>2</sup> Multifunctional Materials Laboratory, Department of Physics, Indian Institute of  
Technology Madras, Chennai 600036, India

\*Corresponding author: manabm@srmist.edu.in, csudakar@iitm.ac.in

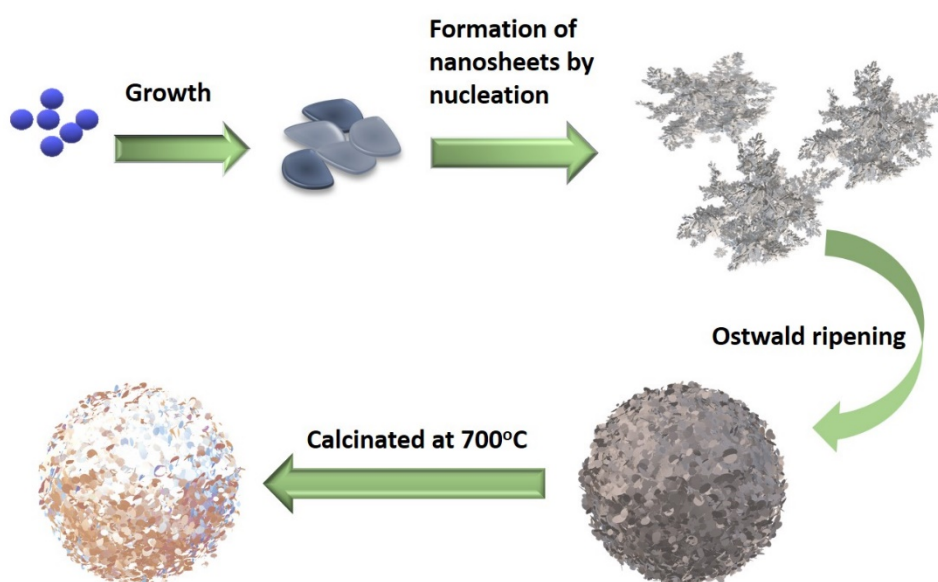

Figure S1. Schematic illustration of the WO<sub>3</sub> microspheres formation.

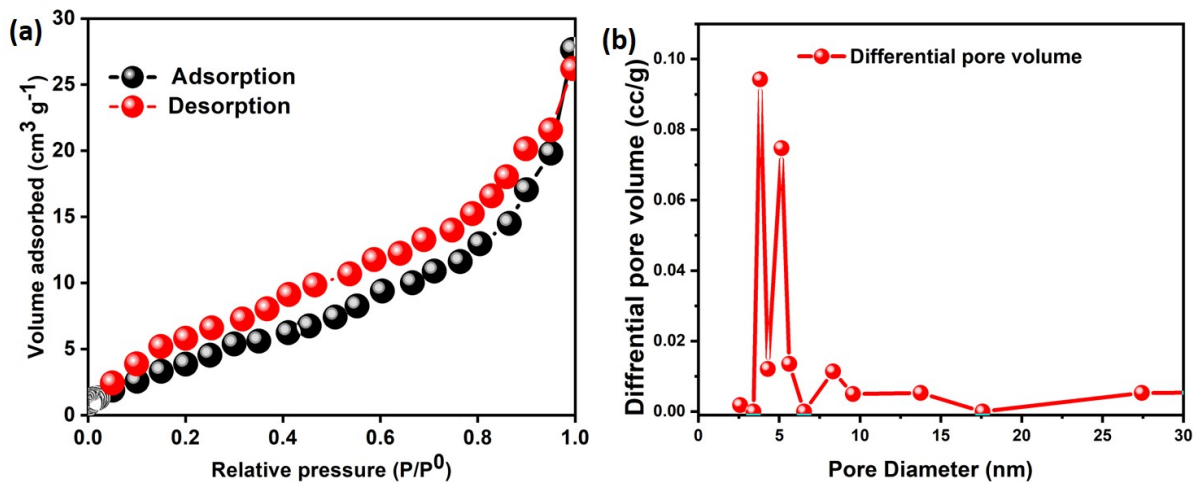

Figure S2. (a) Nitrogen adsorption-desorption isotherm curve of  $\text{WO}_3$ . (b) Pore size distribution plot of  $\text{WO}_3$ .

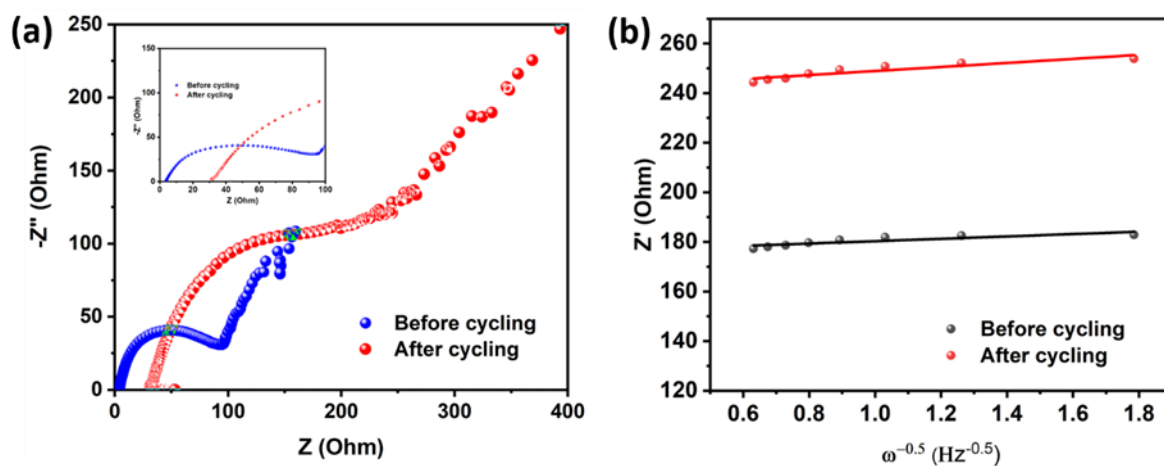

Figure S3. (a) Nyquist plot for  $\text{WO}_3$  before and after cycling. (b) Corresponding linear fitting results at low frequency

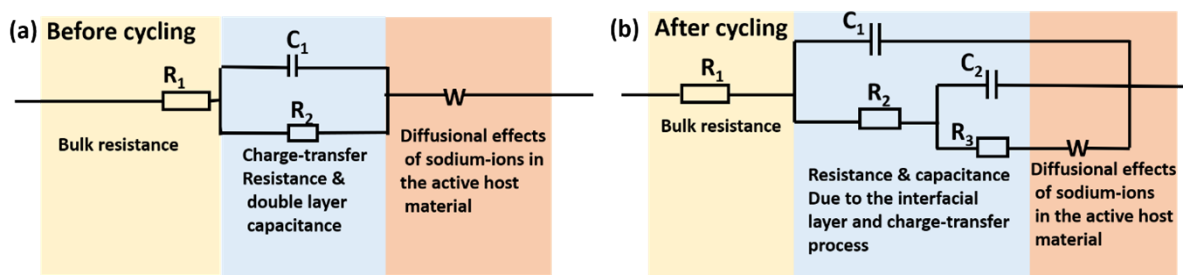

Figure S4. Equivalent circuit for fit the EIS (a) Before cycling and (b) After cycling.

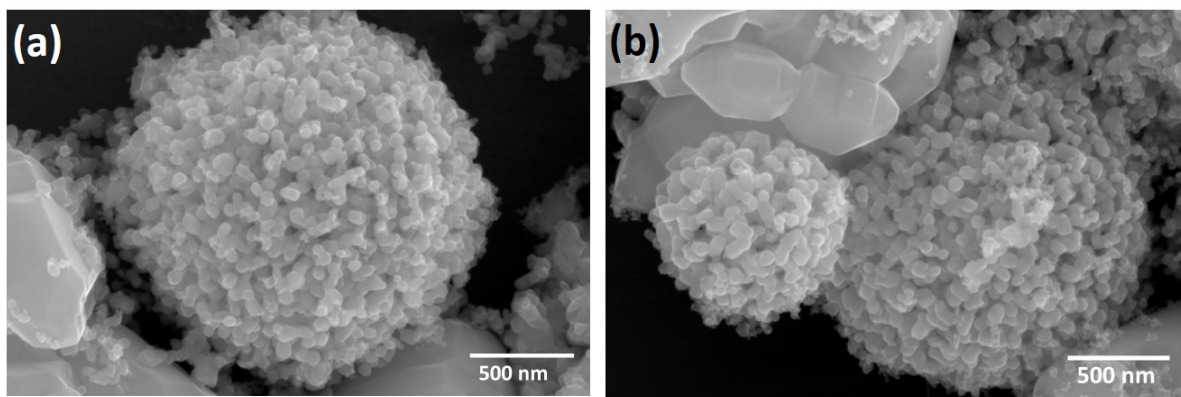

Figure S5. (a and b) HRSEM image of the electrode material after cycling.
